# Supplementary material for: Quality of care for people with multimorbidity: a focus group study with patients and their relatives
Source: HighWire-hosted journal article supplement (doi:10.1136/bmjopen-2020-047025), 2021-06-01
Supplement: bmjopen-2020-047025supp001_data_supplement.pdf [file bmjopen-2020-047025supp001_data_supplement.pdf]

**Appendix to:** Pohontsch et al. Quality of care for people with multimorbidity: A focus group study with patients and their relatives. *BMJ Open* 2021

### **Literature review and rating/consensus process**

Prior to the focus groups a systematic literature search was conducted in different electronic databases. References of relevant articles were reviewed to identify missed relevant publications. Recommendations for clinical management of patients with multimorbidity were extracted and translated to quality indicator candidates. After an online rating of relevance, strength of evidence and their potential for undesirable effects, the interdisciplinary expert panel voted for keeping or rejecting the potential QI via nominal group technique.
